# Supplementary material
Source: publisher figshare collection journal article supplement (https://gsajournals.figshare.com/ndownloader/files/26653088)
Supplement: Supplementary file 1 [file 26653088]

## Sheet: Table_S1
Table S1: Annotation of transposale elements in Zymoseptoria species genomes
Species	Class	Superfamily	Family	Consensus	Copies	Full length copies	Coverage (pb)	Coverage (%)
Z. ardabiliae Za17							6923496	18.1716
	I			33	1326	192	4727261	12.4073
		LINE		4	64	10	109209	0.286633
			L1	1	16	1	30320	0.0795787
			RTE	1	20	3	19917	0.0522747
			Tad	1	18	4	37586	0.0986492
			Tx1	1	10	2	21386	0.0561303
		LTR		27	1239	175	4608351	12.0952
			Copia	4	107	13	183849	0.482535
			Gypsy	23	1132	162	4424502	11.6127
		TRIM	TRIM	2	23	7	9701	0.0254615
	II			27	832	148	1779496	4.67051
		Maverick	Maverick	2	128	19	892711	2.34303
		MITE	MITE	6	143	47	41480	0.108865
		TIR		19	561	82	845305	2.21861
			hAT	6	191	30	476254	1.24999
			MuDR	3	83	10	71050	0.18648
			Pif	4	95	9	57893	0.151947
			PiggyBac	1	71	11	72175	0.189432
			Tc1/Mariner	1	32	6	27944	0.0733426
			Tc3	1	11	2	11281	0.0296084
			TIR	3	78	14	128708	0.33781
	noCat	noCat	noCat	5	216	12	416739	1.09378
Z. brevis Zb87							12101128	29.0986
	I			55	2884	381	7742224	18.6171
		LARD	LARD	2	209	3	365926	0.879912
		LINE		10	408	63	1217924	2.92864
			L2	3	125	50	510604	1.22781
			RTE	4	72	9	142999	0.343858
			Tad	3	211	4	564321	1.35698
				42	2255	309	6105099	14.6804
		LTR	Copia	14	431	94	1051229	2.5278
			Gypsy	28	1824	215	5053870	12.1526
		TRIM	TRIM	3	102	8	28300	0.0680496
		ClassI_noCat	ClassI_noCat	1	12	6	53275	0.128106
	II			89	1973	412	4292167	10.321
		Helitron	Helitron	5	180	28	349132	0.839529
		Maverick	Maverick	4	179	40	1174134	2.82334
		MITE	MITE	7	99	31	27510	0.0661521
		TIR		70	1315	305	2481659	5.96744
			hAT	9	255	51	705943	1.69752
			MuDR	9	153	38	302431	0.727231
			Pif	18	206	60	323326	0.777477
			Tc1/Mariner	11	144	53	184576	0.443835
			TIR	23	557	103	965383	2.32138
		ClassII_noCat	ClassII_noCat	3	200	8	259732	0.624556
	noCat	noCat	noCat	1	51	6	66737	0.160477
Z. passerinii Zpa63							12995082	31.39
	I			62	3163	464	8294369	20.0353
		LARD	LARD	3	218	9	618746	1.4946
		LINE	Tad	1	57	23	207246	0.500609
		LTR		56	2868	417	7457994	18.015
			Copia	17	547	79	790351	1.90912
			Gypsy	39	2321	338	6667643	16.1059
		TRIM	TRIM	2	20	15	10383	0.0250805
	II			50	1583	217	2599919	6.28018
		Helitron	Helitron	3	131	7	116147	0.280556
		Maverick	Maverick	3	113	30	672067	1.6234
		MITE	MITE	4	94	22	23389	0.0564999
		TIR		40	1245	158	1788316	4.31973
			MuDR	4	133	20	173677	0.419522
			Pif	5	127	14	143409	0.346409
			Tc1/Mariner	8	169	26	149895	0.362076
			Tc3	1	21	5	22427	0.0541731
			TIR	22	795	93	1298908	3.13755
	noCat	noCat	noCat	6	399	54	2100794	5.07453
Z. pseudotritici Zp13				76	2444	461	8373017	20.7703
	I			33	1378	210	5364012	13.3061
		LARD	LARD	3	105	5	167666	0.415916
		LTR		29	1266	202	5193961	12.8843
			Copia	6	167	21	639287	1.58583
			Gypsy	23	1099	181	4554674	11.2984
		TRIM	TRIM	1	7	3	2385	0.00592
	II			42	1039	248	2806392	6.96161
		Helitron	Helitron	9	187	34	441346	1.09481
		Maverick	Maverick	5	199	48	1259582	3.12455
		MITE	MITE	7	39	28	18609	0.04617
		TIR		20	571	137	1070409	2.65528
			FOLYT1	1	26	4	16609	0.0412007
			hAT	3	68	8	156515	0.388255
			MuDR	1	19	3	11680	0.0289737
			PiggyBac	1	46	6	27623	0.0685223
			Tc1/Mariner	5	99	25	95435	0.236738
			TIR	9	313	91	762547	1.89159
		ClassII_noCat	ClassII_noCat	1	43	1	16446	0.0407963
	noCat	noCat	noCat	1	27	3	202613	0.502607
Z. tritici Arg00							7886380	19.1654
	I			41	1710	440	5224172	12.6957
		LINE		3	284	76	862330	2.09563
			I	1	158	67	549904	1.33637
			L1	1	16	5	25987	0.0631534
			RTE	1	110	4	286439	0.696101
		LTR		36	1399	355	4352229	10.5767
			Copia	13	333	105	922354	2.2415
		LTR	Gypsy	23	1066	250	3429875	8.33525
		TRIM	TRIM	2	27	9	9613	0.0233614
	II			58	1182	296	2095012	5.09128
		Helitron	Helitron	6	217	44	624108	1.5167
		Maverick	Maverick	1	42	7	133950	0.325524
		MITE	MITE	8	137	52	37990	0.092323
		TIR		41	742	154	989688	2.40513
			hAT	6	116	20	118351	0.287615
			MuDR	4	68	12	71105	0.172799
			Pif	10	156	23	182054	0.442426
			Tc1/Mariner	6	109	34	119509	0.29043
			Tc3	2	30	10	19701	0.0478772
			TIR	13	263	55	478968	1.16398
		ClassII_noCat	ClassII_noCat	2	44	39	309276	0.7516
	noCat	noCat	noCat	6	322	57	567196	1.37839
Z. tritici Aus01							8971709	21.4837
	I			41	2364	379	6007821	14.3863
		LINE		6	394	113	1223041	2.9287
			I	3	273	93	895610	2.14463
			L1	2	34	7	51985	0.124483
			RTE	1	87	13	275446	0.659584
		LTR		34	1942	264	4774447	11.4329
			Copia	11	298	103	865825	2.07331
			Gypsy	23	1644	161	3908622	9.3596
		noCat	noCat	1	28	2	10333	0.0247434
	II			57	1429	342	2743263	6.56903
		Helitron	Helitron	5	179	16	436601	1.04549
		Maverick	Maverick	2	165	41	586716	1.40495
		MITE	MITE	7	108	41	30201	0.0723194
		TIR		42	945	223	1575057	3.77164
			hAT	7	189	28	167902	0.402059
			MuDR	11	202	52	383280	0.917803
			Pif	8	155	35	212733	0.509411
			Tc1/Mariner	7	150	33	191793	0.459268
			TIR	9	249	75	619349	1.4831
		ClassII_noCat	ClassII_noCat	1	32	21	114688	0.274632
	noCat	noCat	noCat	6	355	147	220625	0.528309
Z. tritici CH95							6568973	16.7349
	I			32	1635	282	4591250	11.6965
		LINE		3	368	7	1030889	2.62626
			I	2	284	3	856948	2.18313
			RTE	1	84	4	173941	0.443126
		LTR		24	1195	255	3533262	9.00122
			Copia	6	210	70	655999	1.6712
			Gypsy	18	985	185	2877263	7.33002
		noCat	noCat	1	22	3	9315	0.0237306
		TRIM	TRIM	4	50	17	17784	0.0453059
	II			63	1142	248	1746484	4.44929
		Helitron	Helitron	7	212	29	583052	1.48536
		MITE	MITE	8	86	43	26194	0.066731
		TIR		48	844	176	1137238	2.89719
			hAT	5	98	14	107945	0.274997
			MuDR	6	143	21	196045	0.499438
			Pif	11	181	32	157365	0.400898
			Tc1/Mariner	11	145	38	144287	0.367581
			TIR	15	277	71	531596	1.35428
	noCat	noCat	noCat	7	304	127	231239	0.589097
Z. tritici CNR93							6623927	17.35
	I			39	1441	329	4104225	10.7526
		LINE		9	324	77	850271	2.22761
			I	3	145	66	514292	1.34738
			L1	1	23	2	44080	0.115484
			RTE	5	156	9	291899	0.76474
		LTR		26	1081	238	3221882	8.44094
			Copia	9	293	74	703361	1.84272
			Gypsy	17	788	164	2518521	6.59822
		TRIM	TRIM	4	36	14	32072	0.0840248
	II			64	1229	335	2219748	5.81547
		Helitron	Helitron	3	99	18	313824	0.822181
		Maverick	Maverick	3	130	19	369485	0.968006
		MITE	MITE	10	82	49	29873	0.0782637
		TIR		48	918	249	1506566	3.94702
			FOLYT1	1	16	7	31230	0.0818188
		TIR	hAT	4	94	21	122615	0.321236
		TIR	MuDR	9	161	46	302146	0.791586
		TIR	Pif	11	146	47	229673	0.601716
		TIR	Tc1/Mariner	9	205	42	198211	0.519289
		TIR	Tc3	1	26	10	37740	0.0988742
		TIR	TIR	13	270	76	584951	1.5325
	noCat	noCat	noCat	5	341	92	299954	0.785843
Z. tritici CRI10							6287736	15.8393
	I			35	1338	301	4343307	10.9411
		LINE		11	429	45	1239544	3.1225
			I	3	196	32	762744	1.92141
			Jockey	2	14	2	30808	0.0776077
			L1	1	28	4	36013	0.0907194
			R2	1	62	1	198042	0.498882
			RTE	4	129	6	211937	0.533885
		LTR		21	869	243	3085330	7.77217
			Copia	8	198	100	777089	1.95754
			Gypsy	13	671	143	2308241	5.81463
		noCat	noCat	1	17	2	6759	0.0170264
		TRIM	TRIM	2	23	11	11674	0.0294076
	II			62	957	255	1748396	4.40434
		Helitron	Helitron	6	163	27	585123	1.47397
		Maverick	Maverick	1	23	2	66159	0.166659
		MITE	MITE	10	88	43	30398	0.0765747
		TIR		45	683	183	1066716	2.68714
			hAT	6	103	18	119632	0.301362
			MuDR	5	145	37	213011	0.53659
			Pif	10	127	31	161697	0.407327
			Tc1/Mariner	11	146	45	174790	0.440309
			Tc3	2	17	6	23183	0.0583997
			TIR	11	145	46	374403	0.943149
	noCat	noCat	noCat	4	165	30	196033	0.493822
Z. tritici I93							6564479	16.6587
	I			47	1804	422	4715231	11.9658
		LARD	LARD	2	100	4	70893	0.179905
		LINE		8	272	74	682228	1.73129
			I	1	117	49	396183	1.00539
			Jockey	1	8	1	16077	0.0407986
			L1	3	53	6	89596	0.227368
			LINE	1	21	12	12577	0.0319166
			RTE	2	73	6	167795	0.425813
		LTR		31	1353	327	3939772	9.99795
			Copia	13	411	109	1015588	2.57725
		LTR	Gypsy	18	942	218	2924184	7.42069
		TRIM	TRIM	6	79	17	22338	0.0566871
	II			53	1212	247	1550456	3.93459
		Helitron	Helitron	3	129	13	329146	0.835273
		MITE	MITE	9	131	50	38952	0.0988484
		TIR		41	952	184	1182358	3.00047
			hAT	4	115	14	103210	0.261916
			MuDR	10	191	36	212251	0.538629
			Pif	8	160	22	177910	0.451482
			Tc1/Mariner	8	175	33	152096	0.385973
			Tc3	1	25	2	9810	0.0248948
			TIR	10	286	77	527081	1.33757
	noCat	noCat	noCat	8	403	120	298792	0.758244
Z. tritici IR01_48b							5202479	14.0102
	I			26	1028	229	3300446	8.88804
		LINE		2	176	29	624325	1.6813
			I	1	59	28	225226	0.60653
			RTE	1	117	1	399099	1.07477
		LTR		23	847	198	2673918	7.20081
			Copia	3	91	23	164598	0.443259
			Gypsy	20	756	175	2509320	6.75755
		TRIM	TRIM	1	5	2	2203	0.00593264
	II			60	1202	273	1706344	4.59515
		Crypton	Crypton	1	10	5	26932	0.0725274
		Helitron	Helitron	8	173	33	512649	1.38055
		MITE	MITE	5	79	37	22262	0.0599512
		TIR		46	940	198	1144501	3.08212
			hAT	5	168	18	114748	0.309014
			MuDR	6	151	30	170598	0.459417
			Pif	4	73	17	97876	0.263578
			Tc1/Mariner	10	167	43	201816	0.543487
			Tc3	2	37	9	19431	0.0523274
			TIR	19	344	81	540032	1.4543
	noCat	noCat	noCat	4	159	27	195689	0.526987
Z. tritici KE94							5808133	15.2234
	I			35	1527	256	4247174	11.132
		LARD	LARD	1	71	1	28765	0.0753942
		LINE		5	318	15	1096174	2.87312
			I	1	130	2	515193	1.35034
			L1	1	24	5	61678	0.161661
		LINE	RTE	3	164	8	519303	1.36111
		LTR		24	1071	217	3094513	8.11085
			Copia	7	312	59	568328	1.48961
			Gypsy	17	759	158	2526185	6.62123
		TRIM	TRIM	5	67	23	27722	0.0726604
	II			46	964	201	1332383	3.49223
		Helitron	Helitron	4	125	15	383966	1.00639
		Maverick	Maverick	1	27	3	74296	0.194733
		MITE	MITE	7	101	44	28321	0.0742304
		TIR		34	711	139	845800	2.21688
			hAT	5	92	17	109848	0.287916
			MuDR	3	81	13	91508	0.239846
			Pif	9	132	25	171456	0.449393
			Tc1/Mariner	8	196	38	187485	0.491406
			Tc3	1	18	3	9906	0.025964
			TIR	8	192	43	275597	0.722351
	noCat	noCat	noCat	2	247	17	228576	0.599107
Z. tritici OregS90							7271569	18.3666
	I			41	1543	387	4533025	11.4495
		LINE		4	244	59	646835	1.63378
			I	1	132	55	430125	1.08641
			Jockey	1	7	1	9505	0.0240078
			RTE	2	105	3	207205	0.52336
		LTR		35	1278	317	3874643	9.7866
			Copia	10	373	107	984825	2.48748
			Gypsy	25	905	210	2889818	7.29912
		TRIM	TRIM	2	21	11	11547	0.0291655
	II			65	1344	357	2460307	6.21426
		Helitron	Helitron	3	154	36	510548	1.28955
		Maverick	Maverick	4	123	22	387743	0.979364
		MITE	MITE	13	103	53	32282	0.0815381
		TIR		44	960	245	1524822	3.85141
			FOLYT1	1	19	7	25494	0.0643929
			hAT	5	118	37	189348	0.478256
			MuDR	10	263	69	487176	1.23051
			Pif	8	178	37	226340	0.571691
			Tc1/Mariner	12	209	39	177199	0.44757
			Tc3	1	25	6	30723	0.0776004
			TIR	7	148	50	388542	0.981382
		ClassII_noCat	ClassII_noCat	1	4	1	4912	0.0124068
	noCat	noCat	noCat	6	332	93	278237	0.702773
Z. tritici TN09							6407967	16.9043
	I			36	1291	318	4221748	11.137
		LARD	LARD	1	26	4	51054	0.134681
		LINE		6	143	38	338368	0.892619
			I	2	54	19	124237	0.327739
			Jockey	1	25	4	54612	0.144067
			L1	1	14	5	45455	0.119911
			RTE	2	50	10	114064	0.300902
		LTR		26	1102	268	3822815	10.0846
			Copia	3	90	23	282479	0.745183
			Gypsy	23	1012	245	3540336	9.33945
		TRIM	TRIM	3	20	8	9511	0.0250901
	II			65	1174	272	1935520	5.10593
		Helitron	Helitron	8	240	41	648645	1.71113
		MITE	MITE	9	121	54	35472	0.0935757
		TIR		48	813	177	1251403	3.30122
			hAT	4	87	16	111624	0.294466
		TIR	MuDR	11	182	33	247966	0.654137
		TIR	Pif	8	114	24	194946	0.51427
		TIR	Tc1/Mariner	9	119	29	156538	0.412949
		TIR	TIR	16	311	75	540329	1.42539
	noCat	noCat	noCat	4	97	15	250699	0.661347
Z. tritici UR95							8877151	23.1358
	I			37	1416	329	3890598	10.1397
		LINE		8	461	86	1033071	2.69241
			I	3	212	33	667216	1.73891
			L1	1	14	5	32767	0.0853979
			LINE	1	69	23	50124	0.130634
			RTE	3	166	25	282964	0.737466
		LTR		28	944	238	2852776	7.43495
			Copia	10	283	82	763203	1.98907
			Gypsy	18	661	156	2089573	5.44588
		ClassI_noCat	noCat	1	7	1	8305	0.0216446
		TRIM	TRIM	1	11	5	4751	0.0123821
	II			65	1191	288	1957861	5.10261
		Helitron	Helitron	6	143	26	476729	1.24246
		Maverick	Maverick	2	70	8	203381	0.530055
		MITE	MITE	6	69	31	23197	0.0604565
		TIR		51	909	223	1254554	3.26964
			hAT	5	119	25	124996	0.325767
			MuDR	9	174	42	262776	0.684851
			Pif	12	204	39	263318	0.686264
			PiggyBac	2	48	18	68595	0.178774
			Tc1/Mariner	12	164	51	208207	0.542633
			Tc3	1	25	4	20662	0.0538497
			TIR	10	175	44	306000	0.797503
	noCat	noCat	noCat	4	168	42	175916	0.458475
Z. tritici YEQ92							7033175	17.6396
	I			50	1888	374	4934129	12.375
		LARD	LARD	1	41	3	53258	0.133574
		LINE		12	458	67	981332	2.46123
			I	2	147	38	294206	0.737883
			L1	2	20	5	46439	0.116471
			RTE	8	291	24	640687	1.60688
		LTR		31	1286	280	3831253	9.60898
			Copia	8	228	50	480256	1.20451
			Gypsy	23	1058	230	3350997	8.40447
		ClassI_noCat	noCat	1	39	1	34672	0.0869591
		TRIM	TRIM	5	64	23	33614	0.0843056
	II			77	1446	337	1810607	4.54109
		Helitron	Helitron	8	193	22	265430	0.665712
		Maverick	Maverick	2	68	4	122041	0.306085
		MITE	MITE	10	99	59	34110	0.0855496
		TIR		57	1086	252	1389026	3.48375
			hAT	10	200	32	202188	0.507098
		TIR	MuDR	6	153	25	122465	0.307148
		TIR	Pif	5	123	21	141141	0.353989
		TIR	Tc1/Mariner	11	171	67	232394	0.582856
		TIR	Tc3	1	29	7	21129	0.0529926
		TIR	TIR	24	410	100	669709	1.67966
	noCat	noCat	noCat	1	33	14	288439	0.723419
Z. tritici Zt05							8207117	19.9004
	I			41	1920	341	5877597	14.2518
		LARD	LARD	1	74	2	174464	0.423036
		LINE		7	456	36	1576355	3.8223
			I	1	205	1	712582	1.72785
			L1	1	27	2	53203	0.129005
			RTE	4	190	6	662916	1.60742
			Tad	1	34	27	147654	0.358027
		LTR		30	1357	296	4077503	9.88702
			Copia	10	384	125	1108109	2.68691
			Gypsy	20	973	171	2969394	7.2001
		TRIM	TRIM	2	17	4	9549	0.0231583
		ClassI_noCat	ClassI_noCat	1	16	3	39726	0.0963265
	II			68	1264	301	1974910	4.78871
		Helitron	Helitron	5	133	23	443980	1.07655
		Maverick	Maverick	1	35	8	121451	0.294491
		MITE	MITE	12	154	58	43221	0.104803
		TIR		50	942	212	1366258	3.31287
			hAT	7	125	27	150484	0.364891
			MuDR	6	150	33	243358	0.590088
			Pif	9	171	28	233702	0.566674
			PiggyBac	1	13	6	18011	0.0436726
			Tc1/Mariner	11	203	48	248188	0.601802
			Tc3	3	51	15	32377	0.0785069
			TIR	13	229	55	440138	1.06723
	noCat	noCat	noCat	8	492	61	354610	0.859849
Z. tritici Zt09							6597829	16.625
	I			37	1538	380	4840180	12.1961
		DIRS	DIRS	1	11	3	22982	0.0579092
		LARD	LARD	1	19	1	29342	0.0739349
		LINE		7	374	100	1382174	3.48275
			I	1	179	81	660476	1.66424
			Jockey	1	2	1	7310	0.0184195
			RTE	4	179	6	657312	1.65627
			Tad	1	14	12	57076	0.143818
		LTR		27	1114	273	3394148	8.55245
			Copia	13	349	119	944340	2.37951
		LTR	Gypsy	14	765	154	2449808	6.17294
		TRIM	TRIM	4	43	8	16518	0.0416185
		ClassI_noCat	ClassI_noCat	1	20	3	11534	0.029063
	II			49	1070	202	1361172	3.42984
		Helitron	Helitron	2	150	14	376137	0.947777
		MITE	MITE	11	119	51	36694	0.0924611
		TIR		36	801	137	948341	2.3896
			hAT	3	84	15	102055	0.257155
			MuDR	5	171	15	144192	0.36333
			Pif	8	128	25	139698	0.352006
			Tc1/Mariner	12	202	41	196439	0.494981
			Tc3	1	12	7	21016	0.0529554
			TIR	7	204	34	344941	0.86917
	noCat	noCat	noCat	7	363	78	396477	0.999029
Z. tritici Zt10							6489387	16.5343
	I			43	1502	287	4465305	11.3771
		DIRS	DIRS	1	17	6	37477	0.0954874
		LARD	LARD	2	71	6	113624	0.289502
		LINE		6	235	15	622308	1.58557
			CR1	1	28	1	52156	0.132888
			LINE	1	18	8	11576	0.0294944
			RTE	3	122	5	262362	0.66847
		LINE	Tad	1	67	1	296214	0.754722
		LTR		32	1158	257	3674862	9.36316
			Copia	10	175	48	498275	1.26955
		LTR	Gypsy	22	983	209	3176587	8.09361
		TRIM	TRIM	2	25	11	12805	0.0326258
		ClassI_noCat	ClassI_noCat	2	21	3	17034	0.0434008
	II			69	1255	305	1927967	4.91224
		Crypton	Crypton	1	14	4	28627	0.0729386
		Helitron	Helitron	6	152	17	218204	0.555961
		Maverick	Maverick	2	97	12	309209	0.787832
		MITE	MITE	10	121	61	36551	0.0931216
		TIR		50	871	211	1335376	3.40239
			hAT	6	107	25	161539	0.411584
			MuDR	7	94	26	121688	0.310048
			Pif	8	117	18	157035	0.400104
			PiggyBac	1	42	9	39832	0.101488
			Tc1/Mariner	9	161	42	215369	0.548737
			Tc3	1	5	5	6670	0.0169945
			TIR	18	345	86	633243	1.61344
	noCat	noCat	noCat	4	108	30	96115	0.244891
Z. tritici Zt1A5							6406068	16.1367
	I			36	1567	362	4196647	10.5712
		LINE		13	465	105	1082144	2.72589
			I	3	201	57	559748	1.40999
			Jockey	1	74	5	109933	0.276918
			L1	1	15	2	24863	0.0626292
			LINE	1	25	1	25721	0.0647905
			RTE	3	38	3	66603	0.167771
			Tad	2	99	26	267761	0.674483
			Tx1	2	13	11	27515	0.0693095
		LTR		21	1063	250	3094759	7.79562
			Copia	10	379	113	1087045	2.73824
			Gypsy	11	684	137	2007714	5.05738
		TRIM	TRIM	2	39	7	19744	0.0497346
	II			61	1314	287	1914480	4.82254
		Helitron	Helitron	4	171	26	485213	1.22224
		MITE	MITE	8	156	57	39538	0.099598
		TIR		48	984	203	1377912	3.47094
			FOLYT1	1	40	2	10447	0.0263157
			hAT	5	51	16	71974	0.181305
			MuDR	10	141	36	143424	0.361286
			Pif	7	124	23	127347	0.320787
			Tc1/Mariner	10	190	44	167520	0.421978
			TIR	15	438	82	857200	2.15926
		ClassII_noCat	ClassII_noCat	1	3	1	11817	0.0297667
	noCat	noCat	noCat	3	364	59	294941	0.742949
Z. tritici Zt1E4							6067382	15.707
	I			34	1367	289	4038195	10.454
		LINE		10	311	30	833069	2.15662
			I	1	53	1	158589	0.41055
			Jockey	1	14	2	13627	0.0352772
			RTE	4	75	9	181062	0.468728
			Tad	2	124	13	402867	1.04293
			Tx1	2	45	5	76924	0.199138
		LTR		23	1049	256	3196772	8.2757
			Copia	9	309	103	1006572	2.60578
			Gypsy	14	740	153	2190200	5.66992
		TRIM	TRIM	3	42	16	15236	0.0394425
		ClassI_noCat	ClassI_noCat	1	7	3	8354	0.0216266
	II			51	1027	247	1586454	4.10696
		Helitron	Helitron	3	135	24	377613	0.977553
		MITE	MITE	4	68	31	20642	0.0534345
		TIR		42	816	190	1166680	3.02027
			hAT	8	127	25	153817	0.398199
			MuDR	4	92	20	110894	0.287079
			Pif	7	141	29	156963	0.406341
			Tc1/Mariner	8	122	38	130797	0.338603
			TIR	15	334	78	614209	1.59005
		ClassII_noCat	ClassII_noCat	2	8	2	21519	0.0557077
	noCat	noCat	noCat	7	459	54	442733	1.14613
Z. tritici Zt289							5478188	14.5048
	I			35	1194	293	3658577	9.68697
		LARD	LARD	1	46	2	46346	0.122712
		LINE		5	130	38	418440	1.10792
			I	1	34	23	144172	0.38173
			L1	1	25	2	69240	0.18333
			RTE	3	71	13	205028	0.542862
		LTR		27	980	240	3175894	8.40895
			Copia	8	197	44	474252	1.2557
			Gypsy	19	783	196	2701642	7.15325
		TRIM	TRIM	2	38	13	17897	0.0473866
	II			63	1014	285	1757898	4.65447
		Crypton	Crypton	1	7	3	15883	0.0420541
		Helitron	Helitron	5	121	26	235003	0.622228
		Maverick	Maverick	2	68	12	324904	0.860262
		MITE	MITE	5	49	27	14561	0.0385589
		TIR		50	769	217	1167547	3.09137
			hAT	8	110	26	144457	0.382485
			MuDR	7	104	30	102796	0.272181
			Pif	7	103	19	148206	0.392414
			Tc1/Mariner	9	86	44	104040	0.275471
			Tc3	2	16	9	22825	0.0604347
		TIR	TIR	17	350	89	645223	1.70838
	noCat	noCat	noCat	3	87	31	61713	0.1634
Z. tritici Zt3D1							6135887	15.0916
	I			32	1395	324	3947773	9.70983
		LARD	LARD	1	42	2	30731	0.0755851
		LINE		2	70	27	199969	0.491838
			LINE	1	43	4	81456	0.200347
			Tad	1	27	23	118513	0.291491
		LTR		26	1251	285	3688079	9.07109
			Copia	8	342	113	1008380	2.48018
		LTR	Gypsy	18	909	172	2679699	6.59091
		SINE	SINE	1	7	3	20826	0.051223
		TRIM	TRIM	2	25	7	8168	0.0200936
	II			53	1132	234	1554656	3.82378
		Helitron	Helitron	6	216	22	450653	1.10841
		MITE	MITE	8	107	42	33327	0.0819691
		TIR		38	803	169	1064411	2.61799
			hAT	7	127	29	154516	0.380039
			MuDR	5	163	22	165639	0.407401
			Pif	6	143	19	156808	0.38568
			Tc1/Mariner	8	107	47	135849	0.33413
			Tc3	1	8	4	12992	0.0319547
			TIR	11	255	48	438607	1.07878
		ClassII_noCat	ClassII_noCat	1	6	1	6265	0.0154092
	noCat	noCat	noCat	8	652	69	633458	1.55803
Z. tritici Zt3D7							6110792	16.1399
	I			35	1423	366	4527207	11.9573
		LINE		7	302	96	1034045	2.73113
			CR1	1	64	1	304298	0.803715
			I	1	160	68	559868	1.47873
			L1	1	3	1	5830	0.0153983
			RTE	3	47	3	35808	0.0945765
			Tad	1	28	23	128241	0.338711
		LTR		26	1087	266	3428488	9.05536
			Copia	10	301	97	894693	2.36307
			Gypsy	16	786	169	2533795	6.69229
		TRIM	TRIM	1	18	1	12692	0.0335223
		ClassI_noCat	ClassI_noCat	1	16	3	51982	0.137295
	II			48	885	221	1296695	3.42484
		Helitron	Helitron	5	137	19	374155	0.988222
		MITE	MITE	9	103	52	33330	0.0880357
		TIR		34	645	150	889210	2.34858
			hAT	6	118	26	134134	0.354276
			MuDR	4	130	20	144316	0.381169
			Pif	4	89	14	109751	0.289876
			Tc1/Mariner	9	96	41	130111	0.343642
			Tc3	1	36	4	21451	0.0566566
			TIR	10	176	45	349447	0.922963
	noCat	noCat	noCat	4	278	37	286890	0.757737
Z. tritici Zt469							6274442	15.6267
	I			38	1439	260	4384434	10.9196
		LARD	LARD	1	118	7	260379	0.648484
		LINE		6	115	14	118322	0.294685
			Jockey	1	13	2	7550	0.0188036
			RTE	3	36	8	80145	0.199604
			Tad	2	66	4	30627	0.0762778
		LTR		29	1166	227	3976431	9.90345
			Bel	1	34	6	85547	0.213058
			Copia	4	81	18	171921	0.428176
			Gypsy	24	1051	203	3718963	9.26222
		TRIM	TRIM	2	40	12	29302	0.0729795
	II			50	1044	218	1522343	3.79144
		Helitron	Helitron	5	107	19	256130	0.637902
		MITE	MITE	3	29	22	11515	0.0286732
		TIR		42	908	177	1254698	3.12487
			hAT	5	148	22	168086	0.418625
			MuDR	2	47	6	56044	0.13958
			Pif	8	123	24	154445	0.384648
			Tc1/Mariner	11	197	50	200748	0.499968
			Tc3	2	18	12	19724	0.0491234
			TIR	14	375	63	655651	1.63292
	noCat	noCat	noCat	7	196	28	367665	0.915687
